# Supplementary material
Source: HighWire-hosted journal article supplement (https://www.cmajopen.ca/highwire/filestream/89388/field_highwire_adjunct_files/1/open-2022-0089-original-submission.pdf)
Supplement: open-2022-0089-original-submission.pdf [file open-2022-0089-original-submission.pdf]

## The Economic Impact of Poisoning in British Columbia: A Societal Perspective

Authors: Fahra Rajabali MSc<sup>1</sup>, Kate Turcotte MSc<sup>1</sup>, Alex Zheng MSc<sup>1</sup>, Roy Pursell MD<sup>2,3</sup>, Jane Buxton MBBS, MHSc<sup>3,4</sup>, Ian Pike PhD<sup>1,5</sup>

### Author affiliations:

- 1 BC Injury Research and Prevention Unit, BC Children's Hospital, Vancouver, BC, Canada; frajabali@bcchr.ca; kturcotte@bcchr.ca; alex.zheng@bcchr.ca; ipike@bcchr.ca
- 2 Department of Emergency Medicine, University of British Columbia; roy.pursell@ubc.ca
- 3 BC Drug and Poison Information Centre, Vancouver, BC, Canada
- 4 School of Population and Public Health, University of British Columbia; Jane.Buxton@bccdc.ca
- 5 Department of Pediatrics, University of British Columbia, Vancouver, BC, Canada

Correspondence to: frajabali@bcchr.ca

Competing interests: There are no competing interests to declare.

Funding: This study was not funded.

Data sharing: Requests for aggregate data should be submitted to the corresponding author.

### Abstract

### Introduction

1  
2  
3 The purpose of this study was to examine the health and economic costs of poisoning in British  
4 Columbia (B.C.) for 2016 using a societal perspective, to support public health policies aimed at  
5  
6  
7  
8 minimising losses to society.  
9

## 10 11 **Methods**

12  
13  
14 Costs by intent, sex, and age group were calculated in Canadian dollars using a classification  
15 and costing framework based on existing provincial injury data combined with data from the  
16  
17  
18 published literature. Direct cost components included: fatal poisonings; hospitalizations;  
19  
20  
21 emergency department visits; ambulance attendance without transfer to hospital; and calls to  
22  
23  
24 the British Columbia Drug and Poison Information Centre (BC DPIC) not resulting in ambulance  
25  
26  
27 attendance, emergency care, or transfer to hospital. Indirect costs, measured as loss of earning  
28  
29  
30 and informal caregiving costs, were also calculated.

## 31 32 **Results**

33  
34  
35 Poisonings in B.C. totaled \$812.5 million in 2016: \$108.9 million in direct health care costs and  
36  
37  
38 \$703.6 million in indirect costs. Unintentional poisonings accounted for 84% of total costs, 7% of  
39  
40  
41 direct costs and 93% of indirect costs. Males accounted for higher proportions of direct costs for  
42  
43  
44 all patient dispositions except hospitalizations. Costs among ages 25-64 accounted for higher  
45  
46  
47 proportions of direct costs except for calls to BC DPIC, where proportions were highest for  
48  
49  
50 children <15 years.

## 51 52 **Interpretation**

53  
54  
55 Hospital care expenditures represented the largest direct cost of poisoning while lost  
56  
57  
58 productivity following death represented the largest indirect cost. Quantifying and understanding  
59  
60

1  
2  
3 the financial burden of poisoning has implications not only for government and health care, but  
4  
5  
6 also for society, employers, patients, and families.  
7  
8  
9  
10  
11  
12  
13  
14  
15  
16  
17  
18  
19  
20  
21  
22  
23  
24  
25  
26  
27  
28  
29  
30  
31  
32  
33  
34  
35  
36  
37  
38  
39  
40  
41  
42  
43  
44  
45  
46  
47  
48  
49  
50  
51  
52  
53  
54  
55  
56  
57  
58  
59  
60

Confidential

## Introduction

Poisoning is the leading cause of injury-related death and the second leading cause for injury-related hospitalization in British Columbia (B.C.).<sup>1</sup> Poisonous substances include illicit drugs, prescribed and over the counter medications, alcohol, pesticides, gases, and household cleaners. Exposure to, or consumption of, these substances can result in unintentional, self-harm, or inflicted poisonings leading to severe injury and/or death. Poisoning-related direct costs incurred by the healthcare system in B.C. in 2003 were estimated at \$53.5 million per year in 2003 Canadian dollars and indirect costs, the losses to societal productivity, were estimated at \$3.6 million.<sup>2</sup> Children, youth, young adults, older adults, and Indigenous peoples in Canada are considered high-risk populations for poisoning.<sup>3</sup> While unintentional poisoning deaths and hospitalizations increased from 2008 to 2018, suicide by poisoning decreased.<sup>3</sup> More specifically, poisonings involving narcotics and psychodysleptics, particularly opioid-related poisoning, resulting in death, hospitalization, and emergency department (ED) visits have continued to increase since the early 2000's.<sup>4-6</sup>

Recommendations for poisoning prevention include the traditional approach of education, as well as more innovative ideas. To address poisoning among children, physician training in family medicine and pediatrics should include prevention as part of well-baby visits, providing information on safe storage of household products and use of child-resistant packaging.<sup>7,8</sup> For all ages, poison control centers are a cost-effective source for immediate advice in the event of a poisoning, as well as providing surveillance data.<sup>7,9,10</sup> New recommendations for poisoning prevention in Canada include the need for increased advocacy for the wide-range of best practices; a National product-specific information database; responding to emerging poisoning

1  
2  
3 issues (e.g., cannabis products); mandatory use of carbon monoxide detectors; and developing  
4  
5 national leadership to support the coordination of poisoning prevention.<sup>3</sup>  
6  
7

8  
9 When poisonings occur, they require considerable societal resources to respond and  
10  
11 appropriately address the problem. The purpose of this study was to examine the health and  
12  
13 economic costs of poisoning in B.C. using a societal perspective, to include costs that have an  
14  
15 impact on society as a whole, including individuals, employers, and the government. The study  
16  
17 methods utilized a conservative approach and are therefore an underestimate of the true costs  
18  
19 of poisoning incidents in B.C.  
20  
21  
22  
23  
24  
25  
26

## 27 **Methods**

28  
29  
30 We used an incidence costing, human capital approach;<sup>11</sup> the population of those poisoned in  
31  
32 2016 was costed over each lifetime. Recognizing that future costs are usually less than  
33  
34 present costs due to scientific and technological advancement, direct and indirect costs were  
35  
36 discounted to 1.5% per annum.<sup>12</sup> Dollar values are for the year 2016, the most recent year  
37  
38 available for poisoning injuries and deaths data and population statistics. Average costs were  
39  
40 applied using constant 2016 Canadian dollars.  
41  
42  
43  
44

45 Direct costs are costs to the healthcare system, comprised of all the goods and services  
46  
47 consumed by a person treated for a poisoning-related injury and include ambulance  
48  
49 transportation, emergency care, hospital care, physician services, and rehabilitation. Formal  
50  
51 caregiving by paid workers and organizations were included in direct costs. Costs for vision care  
52  
53 and prescription medications were excluded. Costs for diagnostic and surgical treatment, drug  
54  
55  
56  
57  
58  
59  
60

1  
2  
3 expenditures, clinical treatment, therapy, and rehabilitation were not readily available for each  
4 patient. Comprehensive searches of hospital health records, medical clinic records, and  
5 insurance systems would be needed to extract the required information. For the purposes of this  
6 study, we used average provincial costs of relevant health services to estimate individual victim  
7 costs.  
8  
9

10  
11 Indirect costs are losses to societal productivity, which account for the injured individual's  
12 inability to perform their major activities of daily living and contribute to society, and include the  
13 value of time lost from work due to morbidity, disability, and premature death, measured using  
14 earnings data. A labour productivity growth rate of 1.0%, a labour participation rate of 64.4%,  
15 an unemployment rate of 6.0%, and an average weekly earning of \$897 were applied.<sup>13</sup> We  
16 included the cost of informal caregiving provided by family, friends, and neighbours. Transfer  
17 payments from government or social services were not included as they are a reallocation of  
18 resources and the net effect of the transfer to society is zero.  
19  
20  
21  
22  
23  
24  
25  
26  
27  
28  
29  
30  
31  
32  
33  
34  
35

36 Costs were mainly calculated using the Electronic Resource Allocation Tool (ERAT),<sup>14</sup> providing  
37 a classification and costing framework based on existing provincial injury costs data combined  
38 with data from the published injury costing literature.  
39  
40  
41  
42  
43  
44  
45  
46

#### 47 *Data Sources*

48  
49

50 We extracted death data from the BC Vital Statistic Agency, through the BC Centre for Disease  
51 Control (BCCDC), Chronic Disease and Injury data mart (as of August 2020). We obtained  
52 hospitalization data from the Discharge Abstract Database (DAD) at the BC Ministry of Health.  
53  
54  
55  
56  
57  
58  
59  
60

1  
2  
3 Data were extracted using the 10<sup>th</sup> revision of the (ICD-10 CA) codes; all poisoning ICD-10 CA  
4 codes were extracted and grouped by intent: unintentional (X40-X49); suicide/self-harm (X60-  
5 X69); violence (X85-X90); and undetermined (Y10-Y19). The DAD includes information  
6  
7  
8 pertaining to the total relative case weight associated with different diagnostic, surgical  
9  
10  
11 procedures, and resources (drugs and medical supplies) utilized. An average weight and length  
12  
13  
14 of stay was applied to the total number of hospitalizations. Furthermore, an average provincial  
15  
16  
17 inpatient cost of a standard hospital stay excluding physician care expenditures was applied to  
18  
19  
20 these averages to obtain dollar values.<sup>15</sup> An average value of physician care was applied using  
21  
22  
23 information from the National Physician Database.<sup>16</sup> In-hospital deaths were excluded from the  
24  
25  
26 total hospital count as they were included in the death count.

27  
28 We obtained ED visits data from the BC National Ambulatory Care Reporting System (NACRS)  
29  
30 at the BC Ministry of Health; data were extracted using the ICD-10 CA diagnosis codes for  
31  
32 poisoning and toxic substances (T36-T65). ED visits by intent were estimated using ratios  
33  
34 derived from hospitalization data, as in B.C. the NACRS version used does not include  
35  
36 mechanism of injury and not all hospitals report to NACRS. These ratio estimates were based  
37  
38 on thousands of injury cases over many years, resulting in a well-established and relatively  
39  
40 stable 'Injury Pyramid' representing average counts and ratios between injuries treated in ED,  
41  
42 hospitalized, or are fatal.<sup>17</sup> We obtained data for calls to the British Columbia Drug and Poison  
43  
44 information Centre (BC DPIC) from BC DPIC. BC Emergency Health Services (BC EHS)  
45  
46 provided summary tables for the number of cases attended by ambulance, and we obtained  
47  
48  
49 population data from BC Stats.  
50  
51  
52

### 53 54 55 *Costs Calculation*

1  
2  
3 We organized direct cost components into five mutually exclusive patient disposition categories:  
4  
5  
6 i) fatal poisonings; ii) poisoning hospitalizations with survival to discharge; iii) poisonings treated  
7  
8 in an ED without hospitalization; iv) poisonings and exposure events resulting in ambulance  
9  
10 attendance without transfer to hospital; and v) calls to BC DPIC emergency/information line not  
11  
12 resulting in ambulance attendance, emergency care, or transfer to hospital. The total direct cost  
13  
14 of poisoning was estimated by the sum of the costs in these five categories. Direct cost  
15  
16 components are listed in Table 1. Costs related to mental health and/or psychological services,  
17  
18 and other direct costs borne by patients, family, or other payers were not included.  
19  
20  
21

22  
23 We applied a 0.02% of formal caregiving cost, as provided by paid workers and organizations,  
24  
25 to the health care costs (deaths, hospitalization, ED, and long-term disability) for the first year  
26  
27 following poisoning incidence. As caregiving information was not available for B.C., this cost  
28  
29 was derived from national level data.<sup>18</sup>  
30  
31  
32

33 We calculated productivity losses using B.C. unemployment rates, labour force participation  
34  
35 rates, and average wage rates. Indirect costs were assigned to those 15 to 64 years of age, as  
36  
37 it was assumed that they had all contributed to society, while those under 15 years were not yet  
38  
39 part the workforce, and those 65 years and older had left the workforce.  
40  
41  
42

43 We applied a 0.47% of informal caregiving costs, as provided by family, friends, and  
44  
45 neighbours, to the productivity losses. Similar to formal caregiving, this cost was derived from  
46  
47 national level data.<sup>18</sup>  
48  
49  
50

## 51 52 53 **Results** 54 55 56 57 58 59 60

1  
2  
3  
4 Deaths accounted for a small fraction of the incidence of poisonings in B.C. in 2016, followed by  
5  
6 hospitalizations, ambulance attended ED visits, and calls to BC DPIC (Table 2). The overall rate  
7  
8 of poisoning among males was higher than among females for all patient disposition except  
9  
10 hospitalizations and calls to BC DPIC (Table 3).

11  
12  
13 In total, poisonings cost the province of B.C. \$812,485,347 in 2016 (Table 4). Direct healthcare  
14  
15 costs totaled \$108.9 million: \$12.8 million for fatal poisonings; \$67.2 million for hospitalizations;  
16  
17 \$25.8 million for ED treatment; \$2.1 million for ambulance attendance without transfer; and just  
18  
19 under \$1.0 million for calls to the BC DPIC. Hospitalizations represented 62% of direct costs,  
20  
21 ED treatments 24%, and fatalities 12%. While ambulance attended without transfer and calls to  
22  
23 BC DPIC accounted for the majority of all poisonings, these cases represented only 3% of the  
24  
25 direct costs. Indirect costs were \$703.6 million, with the costs of death accounting for 99.8% at  
26  
27 \$702.0 million.

28  
29  
30  
31  
32  
33 Unintentional poisoning injuries accounted for 84% of total costs (Table 4). Total direct costs  
34  
35 were accounted for primarily by unintentional (46%) and suicide / self-harm (45%), while  
36  
37 unintentional poisoning accounted for 89% of indirect costs. Average costs per case are  
38  
39 presented in Table 4, by patient disposition.  
40  
41  
42

43  
44 Males accounted for 56% of direct costs and 75% of indirect costs (Table 5). Males accounted  
45  
46 for higher proportions of direct costs for deaths, ED visits, and ambulance attendance, while  
47  
48 females accounted for a higher proportion of costs for hospitalizations. All direct costs were  
49  
50 higher among those aged 25-64 years, with the exception of costs for BC DPIC, which were  
51  
52 highest among children <15 years old. The per capita costs for both direct and indirect costs  
53  
54 were higher among those aged 15-24 years. Males accounted for a higher proportion of indirect  
55  
56  
57  
58  
59  
60

1  
2  
3 costs for deaths (75%) while females accounted for a higher proportion for hospitalizations  
4  
5 (57%). Patient disposition cost breakdowns by age group and sex are presented in Table 5.  
6  
7  
8  
9  
10  
11

## 12 **Interpretation**

13

14  
15 Our study estimated the total cost of poisoning in B.C. in 2016 to be \$812.5 million: 13% in  
16  
17 direct and 87% in indirect costs. Hospital care expenditures represented the largest direct cost  
18  
19 at \$67.2 million (8% of total cost), while lost productivity following death represented the largest  
20  
21 indirect cost at \$702 million (86.4% of total). The per capita cost for poisoning of \$167 exceeded  
22  
23 the BC government spending on recreational and sporting services, cultural services, and  
24  
25 broadcasting and publishing services, at \$163.<sup>13</sup> We found that unintentional poisonings lead to  
26  
27 disproportionately more death costs while suicide/self-harm lead to more hospitalization costs.  
28  
29 Previously, we found that unintentional and suicide/self-harm poisonings in B.C. in 2013  
30  
31 accounted for 14% of all injury costs, and that deaths from unintentional and suicide/self-harm  
32  
33 poisonings cost \$246 million, as compared to those from suicide/self-harm by other means at  
34  
35 \$150 million, transport incidences at \$118 million, and falls at \$42 million.<sup>19</sup>  
36  
37  
38  
39  
40  
41

42 Not only were poisoning hospitalizations costs high, but these cases may have also required  
43  
44 long-term rehabilitation and/or mental health and psychological services, further contributing to  
45  
46 the overall economic burden. Poisonings can also result in long-term health consequences not  
47  
48 captured in the indirect costs, such as myocardial injury from carbon monoxide poisoning,<sup>20</sup> or  
49  
50 brain injury from anoxia due to respiratory depression resulting from opioid overdose, with  
51  
52 decreased cognitive ability, depression, or suicide ideation.<sup>21-23</sup> The involvement of narcotics  
53  
54  
55  
56  
57  
58  
59  
60

1  
2  
3 and psychodysleptics (e.g., opioids) in poisoning-related ED visits increased from 30.4 per  
4  
5 100,000 population in 2012/13 to 105.6 per 100,000 in 2016/17; the most common substances  
6  
7 associated with poisoning-related ED visits in 2016/17.<sup>6</sup> It is important to note that 2016  
8  
9 represented only the beginning of the 'opioid crisis'.<sup>24</sup> With the growing number of opioid  
10  
11 overdoses, the Provincial Health Officer declared a public health emergency in April 2016, and  
12  
13 the crisis ramped-up in November and December.<sup>25</sup> Furthermore, during the COVID-19  
14  
15 pandemic, characterized by physical distancing, decreased access to services, and increased  
16  
17 toxicity of drug supply, this crisis continued to grow. In 2020, the number of deaths in B.C. due  
18  
19 to illicit drug toxicity was greater than those resulting from transport incidences, suicides, and  
20  
21 homicides, combined.<sup>26</sup> Paramedic-attended overdoses increased from 13,486 in 2019 to  
22  
23 17,159 in 2020, while illicit drug toxicity deaths increased from 985 to 1,724;<sup>27</sup> and a record-  
24  
25 breaking 2,224 deaths were reported for 2021.<sup>28</sup>

26  
27  
28  
29  
30  
31  
32 Identifying the costs of poisoning will support policies aimed at minimising injuries, disability,  
33  
34 death, and losses to society. As the number of poisonings continues to increase, prevention  
35  
36 programs, specifically those addressing the complexities of substance/opioid use disorder, are  
37  
38 increasingly important. These may extend to access to take-home naloxone kits, supervised  
39  
40 consumption sites and overdose prevention services, opioid agonist therapy, and prescribed  
41  
42 alternatives to the toxic drug supply.<sup>25,29,30</sup> Primary and secondary prevention efforts, such as  
43  
44 poison prevention packaging, education programs, and social marketing campaigns, have  
45  
46 shown to be effective in preventing poisonings among children and overall.<sup>31-33</sup> In addition,  
47  
48  
49  
50  
51  
52  
53  
54  
55  
56  
57  
58  
59  
60  
poison information centres are seen to range from 3- to 13-fold return on investment in health

1  
2  
3 resources.<sup>34-36</sup> Our next focus is to assess the national costs of poisonings, and determine the  
4  
5 effectiveness of services provided by drug and poison information centres in Canada.  
6  
7

### 8 9 *Limitations*

10  
11 Data sources for this study are largely reliant on the expertise of professional data coders,  
12  
13 interpreting written descriptive information into ICD-10 CA codes, which may lack detail about  
14  
15 the injury event. Injury data are available for deaths, hospitalizations, and ED visits. Data on  
16  
17 injuries treated at a doctor's office or walk-in clinic are not available. A large data gap exists for  
18  
19 injuries requiring ongoing care outside of the hospital setting, ranging from short periods to long-  
20  
21 injuries requiring ongoing care outside of the hospital setting, ranging from short periods to long-  
22  
23 term disability. Intangible costs, such as pain and suffering, economic dependence, and social  
24  
25 isolation are difficult to quantify in economic terms and were excluded from the cost  
26  
27 calculations. While it is the standard approach not to include indirect costs for those aged 65  
28  
29 years and older, under the assumption that they are retired from working, this is not reflective of  
30  
31 older adults in the workforce, which is continuing to grow.<sup>37</sup>  
32  
33  
34  
35

### 36 37 *Conclusion*

38  
39 Hospital care expenditures represented the largest direct cost of poisoning while lost  
40  
41 productivity following death represented the largest indirect cost. Quantifying and understanding  
42  
43 the financial burden of poisoning has implications not only for government and health care  
44  
45 expenditures and resources, but also for society, employers, patients, and families. Targeted  
46  
47 prevention programs can reduce both economic costs and long-term health consequences.  
48  
49  
50

### 51 52 **Data-Sharing Statement**

1  
2  
3 Aggregate data tables are available to others. Data can be accessed by contacting the  
4  
5  
6 corresponding author.  
7  
8  
9  
10

11  
12 Word count: 2348  
13

14  
15 Abbreviations:  
16

17

|    |           |                                                                                                                                     |
|----|-----------|-------------------------------------------------------------------------------------------------------------------------------------|
| 18 | B.C.      | British Columbia                                                                                                                    |
| 19 |           |                                                                                                                                     |
| 20 | BCCDC     | BC Centre for Disease Control                                                                                                       |
| 21 |           |                                                                                                                                     |
| 22 | BC DPIC   | British Columbia Drug and Poison Information Centre                                                                                 |
| 23 |           |                                                                                                                                     |
| 24 | BC EHS    | BC Emergency Health Services                                                                                                        |
| 25 |           |                                                                                                                                     |
| 26 | DAD       | Discharge Abstract Database                                                                                                         |
| 27 |           |                                                                                                                                     |
| 28 | ED        | Emergency Department                                                                                                                |
| 29 |           |                                                                                                                                     |
| 30 | ERAT      | Electronic Resource Allocation Tool                                                                                                 |
| 31 |           |                                                                                                                                     |
| 32 | ICD-10 CA | International Statistical Classification of Diseases and Related Health Problems,<br>33<br>34<br>35<br>36<br>37 Canadian Adaptation |
| 38 |           |                                                                                                                                     |
| 39 | NACRS     | National Ambulatory Care Reporting System                                                                                           |
| 40 |           |                                                                                                                                     |
| 41 |           |                                                                                                                                     |
| 42 |           |                                                                                                                                     |
| 43 |           |                                                                                                                                     |
| 44 |           |                                                                                                                                     |
| 45 |           |                                                                                                                                     |
| 46 |           |                                                                                                                                     |
| 47 |           |                                                                                                                                     |
| 48 |           |                                                                                                                                     |
| 49 |           |                                                                                                                                     |
| 50 |           |                                                                                                                                     |
| 51 |           |                                                                                                                                     |
| 52 |           |                                                                                                                                     |
| 53 |           |                                                                                                                                     |
| 54 |           |                                                                                                                                     |
| 55 |           |                                                                                                                                     |
| 56 |           |                                                                                                                                     |
| 57 |           |                                                                                                                                     |
| 58 |           |                                                                                                                                     |
| 59 |           |                                                                                                                                     |
| 60 |           |                                                                                                                                     |

Table 1. Direct Cost Components of Poisoning in B.C. by Patient Disposition

| <b>Deaths</b>                                                                        | <b>Hospitalizations</b>                                                              | <b>ED</b>                                                                            | <b>Ambulance</b>                                                  | <b>BCDPIC</b>                                                                         |
|--------------------------------------------------------------------------------------|--------------------------------------------------------------------------------------|--------------------------------------------------------------------------------------|-------------------------------------------------------------------|---------------------------------------------------------------------------------------|
| Ambulance Service (attendance and transportation, pharmaceuticals, medical supplies) | Calls to BCDPIC and transferred to hospital                                          | Calls to BCDPIC and seen in ED                                                       | Calls to BCDPIC and attended by ambulance                         | Calls to BCDPIC and not attended by ambulance, seen in ED, or transferred to hospital |
| ED treatment (physician care, pharmaceuticals, medical supplies)                     | Ambulance Service (attendance and transportation, pharmaceuticals, medical supplies) | Ambulance Service (attendance and transportation, pharmaceuticals, medical supplies) | Ambulance Service (attendance, pharmaceuticals, medical supplies) |                                                                                       |
| Hospital Care (physician care, pharmaceuticals, medical supplies)                    | ED treatment (physician care, pharmaceuticals, medical supplies)                     | ED treatment (physician care, pharmaceuticals, medical supplies)                     |                                                                   |                                                                                       |
| Coroner service and autopsy                                                          | Hospital Care (physician care, pharmaceuticals, medical supplies)                    | Long-term Medical Care                                                               |                                                                   |                                                                                       |
| Funeral cost                                                                         | Long-term Medical Care<br><br>Long-term Rehabilitation                               | Long-term Rehabilitation                                                             |                                                                   |                                                                                       |

Table 2. Incidence of Poisoning in B.C. by Patient Disposition, 2016

| <b>Patient Disposition</b> | <b>N</b>      | <b>(%)</b>    |
|----------------------------|---------------|---------------|
| Deaths                     | 1,224         | (3%)          |
| Hospitalizations           | 4,657         | (10%)         |
| ED                         | 13,764        | (30%)         |
| Ambulance                  | 4,135         | (9%)          |
| BCDPIC                     | 21,411        | (47%)         |
| <b>Total</b>               | <b>45,191</b> | <b>(100%)</b> |

Confidential

Table 3. Poisoning in B.C. by Patient Disposition, Age Group (years) and Sex, 2016 (rate per 100,000 Population)

| Age Group & Sex | Patient Disposition         |                  |       |           |        |
|-----------------|-----------------------------|------------------|-------|-----------|--------|
|                 | Rate per 100,000 Population |                  |       |           |        |
|                 | Deaths                      | Hospitalizations | ED    | Ambulance | BCDPIC |
| <b>Total</b>    | 25.2                        | 95.8             | 283.3 | 85.1      | 440.6  |
| <15             | 0.0                         | 33.7             | 82.6  | 13.4      | 1690.2 |
| 15-24           | 21.6                        | 182.3            | 470.3 | 92.2      | 203.6  |
| 25-64           | 37.9                        | 101.6            | 318.5 | 77.8      | 94.8   |
| 65-74           | 9.6                         | 64.7             | 192.2 | 53.9      | 111.1  |
| 75+             | 5.3                         | 74.2             | 225.5 | 58.0      | 148.3  |
| <b>Males</b>    | 38.2                        | 79.9             | 384.8 | 86.9      | 346.4  |
| <15             | 0.0                         | 16.7             | 80.3  | 11.0      | 1754.2 |
| 15-24           | 28.6                        | 102.7            | 494.7 | 93.8      | 163.1  |
| 25-64           | 58.6                        | 96.6             | 465.6 | 108.7     | 83.0   |
| 65-74           | 13.8                        | 55.3             | 266.6 | 70.0      | 90.5   |
| 75+             | 7.7                         | 74.0             | 356.8 | 86.3      | 115.5  |
| <b>Females</b>  | 12.4                        | 111.5            | 183.7 | 46.3      | 339.7  |
| <15             | 0.0                         | 51.6             | 85.0  | 15.9      | 1614.2 |
| 15-24           | 13.9                        | 269.2            | 443.6 | 90.5      | 245.8  |
| 25-64           | 17.7                        | 106.5            | 175.4 | 47.8      | 103.7  |
| 65-74           | 5.6                         | 73.7             | 121.4 | 38.5      | 130.3  |
| 75+             | 3.5                         | 74.2             | 122.3 | 35.7      | 175.1  |

Table 4. Costs of Poisoning in B.C. by Patient Disposition and Intent, 2016

| Patient Disposition   | Intent               |                      |                  |                     | Total Costs          | Average Cost/Case |
|-----------------------|----------------------|----------------------|------------------|---------------------|----------------------|-------------------|
|                       | Unintentional        | Suicide/ Self-harm   | Violence         | Undetermined        |                      |                   |
| <b>DIRECT COSTS</b>   |                      |                      |                  |                     |                      |                   |
| <b>Total</b>          | <b>\$50,602,083</b>  | <b>\$49,065,296</b>  | <b>\$104,880</b> | <b>\$9,098,550</b>  | <b>\$108,870,809</b> | <b>\$2,409</b>    |
| Deaths                | \$10,477,741         | \$1,637,934          | \$0              | \$659,361           | \$12,775,036         | \$10,437          |
| Hospitalizations      | \$26,781,476         | \$34,494,494         | \$54,972         | \$5,869,147         | \$67,200,090         | \$14,430          |
| ED                    | \$11,594,162         | \$11,817,653         | \$8,806          | \$2,383,395         | \$25,804,015         | \$1,875           |
| Ambulance             | \$873,134            | \$1,070,241          | \$3,751          | \$184,495           | \$2,131,621          | \$516             |
| BCDPIC                | \$875,570            | \$44,973             | \$37,351         | \$2,152             | \$960,047            | \$45              |
| <b>INDIRECT COSTS</b> |                      |                      |                  |                     |                      |                   |
| <b>Total</b>          | <b>\$629,238,926</b> | <b>\$66,669,581</b>  | <b>\$1,711</b>   | <b>\$7,704,320</b>  | <b>\$703,614,538</b> | <b>\$15,570</b>   |
| Deaths                | \$628,747,121        | \$65,677,574         | \$0              | \$7,585,509         | \$702,010,205        | \$573,538         |
| Hospitalizations      | \$491,805            | \$992,007            | \$1,711          | \$118,811           | \$1,604,333          | \$344             |
| <b>TOTAL COSTS</b>    | <b>\$679,841,009</b> | <b>\$115,734,877</b> | <b>\$106,591</b> | <b>\$16,802,870</b> | <b>\$812,485,347</b> | <b>\$17,979</b>   |
| Deaths                | \$639,224,862        | \$67,315,508         | \$0              | \$8,244,870         | \$714,785,241        | \$583,975         |
| Hospitalizations      | \$27,273,281         | \$35,486,501         | \$56,683         | \$5,987,958         | \$68,804,423         | \$14,774          |
| ED                    | \$11,594,162         | \$11,817,653         | \$8,806          | \$2,383,395         | \$25,804,015         | \$1,875           |
| Ambulance             | \$873,134            | \$1,070,241          | \$3,751          | \$184,495           | \$2,131,621          | \$516             |
| BCDPIC                | \$875,570            | \$44,973             | \$37,351         | \$2,152             | \$960,047            | \$45              |

Table 5. Costs of Poisonings in B.C. by Patient Disposition, Age Group (years) and Sex, 2016

| Age Group<br>(Population)<br>& Sex | Patient Disposition  |                     |                     |                    |                  | Total<br>Direct Costs | Per Capita<br>Cost |
|------------------------------------|----------------------|---------------------|---------------------|--------------------|------------------|-----------------------|--------------------|
|                                    | Deaths               | Hospitalizations    | ED                  | Ambulance          | BCDPIC           |                       |                    |
| <b>DIRECT COSTS</b>                |                      |                     |                     |                    |                  |                       |                    |
| <b>Total (4,859,250)</b>           | <b>\$12,498,167</b>  | <b>\$67,174,801</b> | <b>\$25,801,820</b> | <b>\$2,125,344</b> | <b>\$750,654</b> | <b>\$108,350,785</b>  | <b>\$22.30</b>     |
| <15 (703,176)                      | \$0                  | \$2,051,030         | \$784,021           | \$71,172           | \$531,563        | \$3,437,786           | \$4.89             |
| 15-24 (589,297)                    | \$1,186,425          | \$11,344,913        | \$4,401,531         | \$357,789          | \$54,119         | \$17,344,777          | \$29.43            |
| 25-64 (2,721,148)                  | \$10,456,162         | \$41,992,987        | \$16,577,542        | \$1,387,134        | \$116,291        | \$70,530,116          | \$25.92            |
| 65-74 (489,618)                    | \$608,735            | \$5,980,987         | \$2,175,265         | \$172,653          | \$24,651         | \$8,962,292           | \$18.30            |
| 75+ (356,011)                      | \$246,845            | \$5,804,884         | \$1,863,461         | \$136,595          | \$24,030         | \$8,075,816           | \$22.68            |
| <b>Male (2,405,364)</b>            | <b>\$9,303,546</b>   | <b>\$31,279,613</b> | <b>\$18,312,276</b> | <b>\$1,371,506</b> | <b>\$375,990</b> | <b>\$60,642,931</b>   | <b>\$25.21</b>     |
| <15 (360,168)                      | \$0                  | \$512,236           | \$359,625           | \$31,324           | \$283,281        | \$1,186,467           | \$3.29             |
| 15-24 (307,750)                    | \$844,537            | \$3,647,082         | \$2,488,168         | \$189,146          | \$22,834         | \$7,191,766           | \$23.37            |
| 25-64 (1,342,218)                  | \$7,949,242          | \$22,027,025        | \$12,657,557        | \$953,496          | \$51,677         | \$43,638,997          | \$32.51            |
| 65-74 (238,563)                    | \$361,378            | \$2,900,353         | \$1,582,795         | \$108,847          | \$9,912          | \$4,963,285           | \$20.80            |
| 75+ (156,665)                      | \$148,389            | \$2,192,917         | \$1,224,131         | \$88,693           | \$8,286          | \$3,662,416           | \$23.38            |
| <b>Female (2,453,886)</b>          | <b>\$3,194,621</b>   | <b>\$35,895,187</b> | <b>\$7,489,544</b>  | <b>\$753,837</b>   | <b>\$374,664</b> | <b>\$47,707,854</b>   | <b>\$19.44</b>     |
| <15 (343,008)                      | \$0                  | \$1,538,794         | \$424,396           | \$39,847           | \$248,282        | \$2,251,319           | \$6.56             |
| 15-24 (281,547)                    | \$341,889            | \$7,697,831         | \$1,913,363         | \$168,643          | \$31,285         | \$10,153,011          | \$36.06            |
| 25-64 (1,378,930)                  | \$2,506,920          | \$19,965,961        | \$3,919,985         | \$433,638          | \$64,614         | \$26,891,118          | \$19.50            |
| 65-74 (251,055)                    | \$247,357            | \$3,080,634         | \$592,470           | \$63,806           | \$14,739         | \$3,999,007           | \$15.93            |
| 75+ (199,346)                      | \$98,455             | \$3,611,967         | \$639,330           | \$47,903           | \$15,744         | \$4,413,399           | \$22.14            |
| <b>INDIRECT COSTS</b>              |                      |                     |                     |                    |                  |                       |                    |
| <b>Total (4,859,250)</b>           | <b>\$702,010,205</b> | <b>\$1,604,333</b>  | N/A                 | N/A                | N/A              | <b>\$703,614,538</b>  | <b>\$144.80</b>    |
| 15-24 (589,297)                    | \$143,391,615        | \$341,970           |                     |                    |                  | \$143,733,584         | \$243.91           |

|                           |                      |                  |                      |                 |
|---------------------------|----------------------|------------------|----------------------|-----------------|
| 25-64 (2,721,148)         | \$558,618,590        | \$1,262,364      | \$559,880,954        | \$205.75        |
| <b>Male (2,405,364)</b>   | <b>\$525,000,709</b> | <b>\$697,236</b> | <b>\$525,697,944</b> | <b>\$218.55</b> |
| 15-24 (307,750)           | \$98,586,712         | \$100,694        | \$98,687,406         | \$320.67        |
| 25-64 (1,342,218)         | \$426,413,997        | \$596,542        | \$427,010,538        | \$318.14        |
| <b>Female (2,453,886)</b> | <b>\$177,009,496</b> | <b>\$907,098</b> | <b>\$177,916,594</b> | <b>\$72.50</b>  |
| 15-24 (281,547)           | \$44,804,902         | \$241,276        | \$45,046,178         | \$160.00        |
| 25-64 (1,378,930)         | \$132,204,594        | \$665,822        | \$132,870,416        | \$96.36         |

Confidential

## References

1. Poisoning [Internet]. BC Injury Research and Prevention Unit. [cited 2022Apr5].  
Available from: <https://injuryresearch.bc.ca/injury-priorities/poisoning-2/>
2. Pike I, Han G, Kinney J, Smith D. The economic burden of poisoning in British Columbia. Vancouver (BC): BC Injury Research and Prevention Unit; 2006.
3. Jiang, A., Belton, K. L., & Fuselli, P. Evidence Summary on the Prevention of Poisoning in Canada. Toronto (ON): Parachute; 2020.
4. O'Connor Shannon GV, Krista L. At-a-glance-Hospitalizations and emergency department visits due to opioid poisoning in Canada. Health Promot Chronic Dis Prev Can: Res Policy Pract. 2018 Jun;38(6):244.
5. Alsabbagh MW, Chang F, Cooke M, Elliott SJ, Chen M. National trends in population rates of opioid-related mortality, hospitalization and emergency department visits in Canada between 2000 and 2017. A population-based study. Addiction. 2021 Dec 1;116(12):3482-93.
6. Pauer S, Rajabali F, Zheng A, Pike I, Pursell R, Zargaran A, Babul S. Socioeconomic factors and substances involved in poisoning-related emergency department visits in British Columbia, Canada. Health Promot. Chronic Dis Prev Can: Res Policy Pract. 2021 Aug;41(7-8):211.
7. Temple AR. Poison prevention education. Pediatrics. 1984 Nov;74(5):964-9.
8. Gerard JM, Klasner AE, Madhok M, Scalzo AJ, Barry RC, Laffey SP. Poison prevention counseling: a comparison between family practitioners and pediatricians. Arch Pediatr Adolesc Med. 2000 Jan 1;154(1):65-70.

- 1  
2  
3 9. Miller TR, Lestina DC. Costs of poisoning in the United States and savings from poison  
4 control centers: a benefit-cost analysis. *Ann Emerg Med*. 1997 Feb 1;29(2):239-45.  
5  
6
- 7  
8 10. Wang A, Law R, Lyons R, Choudhary E, Wolkin A, Schier J. Assessing the public health  
9 impact of using poison center data for public health surveillance. *Clin Toxicol*. 2018 Jul  
10 3;56(7):646-52.  
11  
12
- 13 11. Rice DP, Hodgson TA. The value of human life revisited. *Am J Public Health*. 1982  
14 Jun;72(6):536-8.  
15  
16
- 17 12. Guidelines for the Economic Evaluation of Health Technologies: Canada - 4th edition  
18 [Internet]. CADTH; 2017 [cited 2022Apr5]. Available from:  
19 [https://www.cadth.ca/guidelines-economic-evaluation-health-technologies-canada-4th-](https://www.cadth.ca/guidelines-economic-evaluation-health-technologies-canada-4th-edition)  
20 [edition](https://www.cadth.ca/guidelines-economic-evaluation-health-technologies-canada-4th-edition)  
21  
22
- 23 13. Table 1 Consolidated per capita spending by selected Canadian classification of  
24 functions of government, 2016 Archived Content [Internet]. Statistics Canada; 2018  
25 [cited 2022Apr5]. Available from: [https://www150.statcan.gc.ca/n1/daily-](https://www150.statcan.gc.ca/n1/daily-quotidien/180111/t001b-eng.htm)  
26 [quotidien/180111/t001b-eng.htm](https://www150.statcan.gc.ca/n1/daily-quotidien/180111/t001b-eng.htm)  
27  
28
- 29 14. Potential lost, potential for change: the cost of injury, 2021 [Internet]. Parachute; 2021  
30 [cited 2022Apr5]. Available from: [https://parachute.ca/en/professional-resource/cost-of-](https://parachute.ca/en/professional-resource/cost-of-injury-in-canada/)  
31 [injury-in-canada/](https://parachute.ca/en/professional-resource/cost-of-injury-in-canada/)  
32  
33
- 34 15. Cost of a Standard Hospital Stay [Internet]. Canadian Institute for Health Information  
35 (CIHI); 1996-2022 [cited 2022Apr5]. Available from:  
36 [https://yourhealthsystem.cihi.ca/hsp/inbrief?lang=en#!/indicators/015/cost-of-a-standard-](https://yourhealthsystem.cihi.ca/hsp/inbrief?lang=en#!/indicators/015/cost-of-a-standard-hospital-stay-cshs;/mapC1;mapLevel2;provinceC9001;/)  
37 [hospital-stay-cshs;/mapC1;mapLevel2;provinceC9001;/](https://yourhealthsystem.cihi.ca/hsp/inbrief?lang=en#!/indicators/015/cost-of-a-standard-hospital-stay-cshs;/mapC1;mapLevel2;provinceC9001;/)  
38  
39  
40  
41  
42  
43  
44  
45  
46  
47  
48  
49  
50  
51  
52  
53  
54  
55  
56  
57  
58  
59  
60



- 1  
2  
3  
4 23. Darke S, Williamson A, Ross J, Mills KL, Havard A, Teesson M. Patterns of nonfatal  
5  
6 heroin overdose over a 3-year period: findings from the Australian treatment outcome  
7  
8 study. *J Urban Health*. 2007 Mar;84(2):283-91.  
9
- 10  
11 24. Health. [Internet]. Provincial health officer declares public health emergency.  
12  
13 Government of British Columbia; 2016 [cited 2022Apr5]. Available from:  
14  
15 <https://news.gov.bc.ca/releases/2016HLTH0026-000568>  
16  
17
- 18 25. Young S, Williams S, Otterstatter M, Lee J, Buxton J. Lessons learned from ramping up  
19  
20 a Canadian Take Home Naloxone programme during a public health emergency: a  
21  
22 mixed-methods study. *BMJ Open*. 2019 Oct 1;9(10):e030046.  
23  
24
- 25 26. BC Injury Research and Prevention Unit (BCIRPU). BC Vital Statistics, Ministry of  
26  
27 Health. Retrieved from BCIRPU Injury Data Online Tool, 2022.  
28  
29
- 30 27. Overdose response indicators [Internet]. BC Centre for Disease Control. Provincial  
31  
32 Health Services Authority; 2022 [cited 2022Apr5]. Available from:  
33  
34 <http://www.bccdc.ca/health-professionals/data-reports/overdose-response-indicators>  
35  
36
- 37 28. Illicit drug toxicity deaths in BC - British Columbia [Internet]. Ministry of Public Safety &  
38  
39 Solicitor General; 2022 [cited 2022Apr5]. Available from:  
40  
41 [https://www2.gov.bc.ca/assets/gov/birth-adoption-death-marriage-and-](https://www2.gov.bc.ca/assets/gov/birth-adoption-death-marriage-and-divorce/deaths/coroners-service/statistical/illicit-drug.pdf)  
42  
43 [divorce/deaths/coroners-service/statistical/illicit-drug.pdf](https://www2.gov.bc.ca/assets/gov/birth-adoption-death-marriage-and-divorce/deaths/coroners-service/statistical/illicit-drug.pdf)  
44  
45
- 46 29. Irvine MA, Buxton JA, Otterstatter M, Balshaw R, Gustafson R, Tyndall M, Kendall P,  
47  
48 Kerr T, Gilbert M, Coombs D. Distribution of take-home opioid antagonist kits during a  
49  
50 synthetic opioid epidemic in British Columbia, Canada: a modelling study. *Lancet Public*  
51  
52 *Health*. 2018 May 1;3(5):e218-25.  
53  
54  
55  
56  
57  
58  
59  
60

- 1  
2  
3  
4 30. Irvine MA, Kuo M, Buxton JA, Balshaw R, Otterstatter M, Macdougall L, Milloy MJ,  
5  
6 Bharmal A, Henry B, Tyndall M, Coombs D. Modelling the combined impact of  
7  
8 interventions in averting deaths during a synthetic-opioid overdose epidemic. *Addiction*.  
9  
10 2019 Sep;114(9):1602-13.  
11  
12
- 13 31. Walton WW. An evaluation of the poison prevention packaging act. *Pediatrics*. 1982  
14  
15 Mar;69(3):363-70.  
16  
17
- 18 32. Institute of Medicine. Forging a Poison Prevention and Control System. Washington  
19  
20 (DC): The National Academies Press; 2004. Available from:  
21  
22 <https://doi.org/10.17226/10971>  
23  
24
- 25 33. Pike I, Scime G, Lafreniere K. Preventable: a social marketing campaign to prevent  
26  
27 injuries in British Columbia, Canada. *Inj Prev*. 2012 Oct 1;18(Suppl 1):A176-7.  
28  
29  
30
- 31 34. Final Report on the Value of the Poison Center System [White paper]. Falls Church  
32  
33 (VA): Lewin Group; 2012. Available from: [https://www.webpoisoncontrol.org/-](https://www.webpoisoncontrol.org/-/media/files/webpoisoncontrol/press-info/lewin-report-value-of-the-poison-center-system.pdf)  
34  
35 [/media/files/webpoisoncontrol/press-info/lewin-report-value-of-the-poison-center-](https://www.webpoisoncontrol.org/-/media/files/webpoisoncontrol/press-info/lewin-report-value-of-the-poison-center-system.pdf)  
36  
37 [system.pdf](https://www.webpoisoncontrol.org/-/media/files/webpoisoncontrol/press-info/lewin-report-value-of-the-poison-center-system.pdf)  
38  
39
- 40 35. Galvao TF, Silva EN, Silva MT, Bronstein AC, Pereira MG. Economic evaluation of  
41  
42 poison centers: a systematic review. *Int J Technol Assess Health Care*. 2012  
43  
44 Apr;28(2):86-92.  
45  
46
- 47 36. Huynh A, Cairns R, Brown JA, Jan S, Robinson J, Lynch AM, Wylie C, Buckley NA,  
48  
49 Dawson AH. Health care cost savings from Australian Poisons Information Centre  
50  
51 advice for low risk exposure calls: SNAPSHOT 2. *Clin Toxicol*. 2020 Jul 2;58(7):752-7.  
52  
53  
54  
55  
56  
57  
58  
59  
60

1  
2  
3 37. Census in Brief. Working Seniors in Canada [Internet]. Statistics Canada; 2017 [cited  
4  
5 2022Apr5]. Available from: [Confidential](https://www12.statcan.gc.ca/census-recensement/2016/as-<br/>6<br/>7 <u>sa/98-200-x/2016027/98-200-x2016027-eng.cfm</u></a><br/>8<br/>9<br/>10<br/>11<br/>12<br/>13<br/>14<br/>15<br/>16<br/>17<br/>18<br/>19<br/>20<br/>21<br/>22<br/>23<br/>24<br/>25<br/>26<br/>27<br/>28<br/>29<br/>30<br/>31<br/>32<br/>33<br/>34<br/>35<br/>36<br/>37<br/>38<br/>39<br/>40<br/>41<br/>42<br/>43<br/>44<br/>45<br/>46<br/>47<br/>48<br/>49<br/>50<br/>51<br/>52<br/>53<br/>54<br/>55<br/>56<br/>57<br/>58<br/>59<br/>60</p></div><div data-bbox=)
